# Supplementary material for: REVISE: Re-Evaluating the Inhibition of Stress Erosions in the ICU: a randomised trial protocol
Source: PubMed Central journal article supplement — BMJ Open. 2023 Nov 15;13(11):e075588. doi: 10.1136/bmjopen-2023-075588 (PMC10660838; doi:10.1136/bmjopen-2023-075588), 2023-11-15
Supplement: bmjopen-2023-075588supp001.pdf [file bmjopen-2023-075588supp001.pdf]

Form 1

REVISE RCT170

Plate #001

Visit #000

Patient ID

Patient Initials

Date

**SCREENING (Form 1)**

**1. Inclusion Criteria** (please mark the appropriate box with an 'x')

1. Patient is ≥ 18 years of age
2. Receiving invasive mechanical ventilation (endotracheal tube or tracheostomy) in an ICU and at the time of screening, in the opinion of the treating ICU physician, mechanical ventilation is expected to continue at least until the end of the day after tomorrow

|    | YES                        | NO                         |
|----|----------------------------|----------------------------|
| 1. | Y <input type="checkbox"/> | N <input type="checkbox"/> |
| 2. | Y <input type="checkbox"/> | N <input type="checkbox"/> |

**2. Exclusion Criteria** (contraindications)

1. MD considers Pantoprazole or placebo are indicated or contraindicated; reason: \_\_\_\_\_
2. Pantoprazole contraindicated due to specific local product information  
**Australia/New Zealand Sites Only:**
  - Being treated with HIV protease inhibitors atazanavir (Reyataz) or nelfinavir (Viracept)
  - Being treated with high dose methotrexate defined as >300mg/day per chemotherapy
  - Documented cirrhosis or severe liver disease (e.g., INR > 5.0 due to liver disease)**Canadian Sites Only:**
  - Being treated with rilpivirine (Edurant) or atazanavir (Reyataz)
3. Patient in whom a proton pump inhibitor (PPI) or a histamine-2 receptor antagonist (H<sub>2</sub>RA) is indicated due to active bleeding or increased bleeding risk, defined as:
  - a. Acute gastrointestinal bleeding (ICU physician's clinical opinion)
  - b. Peptic ulcer bleeding within last 8 weeks of screening
  - c. Severe esophagitis
  - d. Current or recent Barrett's esophagus
  - e. Zollinger-Ellison syndrome
  - f. Any previous hospital admission for upper GI bleeding (receiving PPIs for mild dyspepsia or mild gastroesophageal reflux or an uncertain indication are not excluded)
4. Invasive mechanical ventilation for ≥ 72 hours pre-screening (including referring ICU/ER)
5. Patient received > 24hours of PPI or H<sub>2</sub>RA (this ICU admission including referring ICU)
6. Being treated with, or need for, dual antiplatelet therapy (e.g., ASA **and** clopidogrel)
7. Admitted for palliative care or physician is not committed to life-sustaining therapies
8. Known or suspected pregnancy
9. Other (e.g., recent gastric bypass, anaphylaxis requiring H<sub>2</sub>RA), specify: \_\_\_\_\_

|    | YES                        | NO                         |
|----|----------------------------|----------------------------|
| 1. | Y <input type="checkbox"/> | N <input type="checkbox"/> |
| 2. | Y <input type="checkbox"/> | N <input type="checkbox"/> |
| 3. | Y <input type="checkbox"/> | N <input type="checkbox"/> |
| 4. | Y <input type="checkbox"/> | N <input type="checkbox"/> |
| 5. | Y <input type="checkbox"/> | N <input type="checkbox"/> |
| 6. | Y <input type="checkbox"/> | N <input type="checkbox"/> |
| 7. | Y <input type="checkbox"/> | N <input type="checkbox"/> |
| 8. | Y <input type="checkbox"/> | N <input type="checkbox"/> |
| 9. | Y <input type="checkbox"/> | N <input type="checkbox"/> |

**3. Eligible Non-Randomized Patients**

1. Patient declines a priori consent, reason: \_\_\_\_\_
2. Substitute decision maker (SDM) declines a priori consent, reason: \_\_\_\_\_
3. Patient unable to consent, no SDM available and no deferred consent allowed
4. MD declined, reason: \_\_\_\_\_
5. Other reason patient/SDM not approached, specify: \_\_\_\_\_
6. Randomized previously in REVISE Trial

|    |                            |                            |
|----|----------------------------|----------------------------|
| 1. | Y <input type="checkbox"/> | N <input type="checkbox"/> |
| 2. | Y <input type="checkbox"/> | N <input type="checkbox"/> |
| 3. | Y <input type="checkbox"/> | N <input type="checkbox"/> |
| 4. | Y <input type="checkbox"/> | N <input type="checkbox"/> |
| 5. | Y <input type="checkbox"/> | N <input type="checkbox"/> |
| 6. | Y <input type="checkbox"/> | N <input type="checkbox"/> |

- 4. Patient Status** (please check ONE box only)  **Included, proceed to Randomization**  **Eligible, non-randomized**

Proceed to Randomization

29 December 2022

REVISE RCT170

Plate #003

Visit #000

Patient ID [ ][ ][ ][ ] 1 [ ][ ][ ][ ]

F L Patient Initials [ ][ ]

CONSENT (Form 2)

1. Consent Encounter

A. Consent timing: [ ] A priori (pre-randomization) [ ] Deferred

B. Consent request by: [ ] Research Coordinator [ ] Site Investigator [ ] ICU Physician

2. Was verbal or written informed consent obtained?

Table with columns: In ICU, In Hospital, Post Hospital, Date (dd/mm/yyyy), Consent Method: In-person, Telephone. Rows for Patient, Substitute decision maker (SDM), and Other, specify.

In New Zealand, discussion of patient wishes with family or friend documented? [ ] Yes [ ] No

Table with columns: In ICU, In Hospital, Post Hospital, Date (dd/mm/yyyy), Consent Method: In-person, Telephone. Rows for Patient, Substitute decision maker (SDM), and Other, specify.

Reason for decline, specify: [ ] Prefers PPI [ ] Prefers placebo [ ] Distressed SDM [ ] Family discord [ ] Other, specify: \_\_\_\_\_

[ ] No consent, patient lacked capacity to provide consent and no SDM available throughout hospital stay

[ ] No consent, patient deceased and was never competent to provide consent, and no SDM available throughout hospital stay

3. Consent obtained then revoked?

Table with columns: In ICU, In Hospital, Post Hospital, Date (dd/mm/yyyy). Rows for Patient, Substitute decision maker (SDM), and Other, specify.

Details (check ALL that apply):

- [ ] Allow retention of data collected prior to refusal/revocation [ ] Decline retention of data collected prior to refusal/revocation
[ ] Allow data collection after refusal/revocation [ ] Decline data collection after refusal/revocation
[ ] Decline further study drug [ ] Other, specify \_\_\_\_\_

4. If no consent was obtained, has the REC/REB approved the use of this patient's data as provided?

[ ] Not applicable, consent obtained

[ ] No [ ] Yes, in original REC/REB submission -> [ ] All data collection [ ] Vital Status ONLY
[ ] Yes, by recent REC/REB correspondence -> [ ] Other, specify: \_\_\_\_\_

Form 3

|                 |  |  |  |  |  |  |  |  |  |  |  |            |  |                    |  |            |  |              |  |  |  |
|-----------------|--|--|--|--|--|--|--|--|--|--|--|------------|--|--------------------|--|------------|--|--------------|--|--|--|
| REVISION RCT170 |  |  |  |  |  |  |  |  |  |  |  | Plate #005 |  |                    |  | Visit #000 |  |              |  |  |  |
| Patient ID      |  |  |  |  |  |  |  |  |  |  |  | F L        |  | Randomization Date |  |            |  | (dd/mm/yyyy) |  |  |  |
| 1               |  |  |  |  |  |  |  |  |  |  |  |            |  | 20                 |  |            |  |              |  |  |  |

**RANDOMIZATION (Form 3) - CANADA****FOR RESEARCH COORDINATOR**

1. Pre-Hospital H<sub>2</sub>RA or PPI receipt?  
(including home, retirement home or nursing home)

**H<sub>2</sub>RAs:** ranitidine (Zantac),  
cimetidine (Tagamet), famotidine (Pepcid)  
or nizatidine (Axid)

**PPIs:** pantoprazole (Pantoloc, Tecta),  
omeprazole (Losec), lansoprazole (Prevacid),  
dexlansoprazole, (Dexilant), rabeprazole (Pariet)  
or esomeprazole (Nexium)

**NO**

Patient will be in  
**Start/No Start  
stratum**  
(no pre-Hospital  
PPI or H<sub>2</sub>RA use)

**YES**

Patient will be in  
**Continue/Discontinue  
stratum**  
(had pre-Hospital  
PPI or H<sub>2</sub>RA use)

2. How was pre-hospital stress ulcer  
prophylaxis verified? (not all are needed,  
but check ALL that apply):

- Chart review including list of home meds  
 Chart review but no list of home meds available  
 Conversation with SDM about home meds  
 Conversation with patient about home meds  
 Conversation with outpatient pharmacy about home meds  
 Hospital pharmacy reconciliation  
 Provincial/state drug database review (e.g., Netcare, Dossier Santé Québec)

3. Date of birth:

|                      |                      |                      |                      |                      |                      |
|----------------------|----------------------|----------------------|----------------------|----------------------|----------------------|
| <input type="text"/> |
| (dd/mm/yyyy)         |                      |                      |                      |                      |                      |

**FOR RESEARCH PHARMACIST ONLY - Randomization**

via web: [www.randomize.net](http://www.randomize.net)

4. Trial assignment (please select one):

Pantoprazole

Placebo

5. Time of randomization (24 hour clock):

|                      |                      |   |                      |                      |
|----------------------|----------------------|---|----------------------|----------------------|
| <input type="text"/> | <input type="text"/> | : | <input type="text"/> | <input type="text"/> |
|----------------------|----------------------|---|----------------------|----------------------|

6. Study Pharmacist initials:

|                      |                      |
|----------------------|----------------------|
| <input type="text"/> | <input type="text"/> |
| F                    | L                    |

29 December 2022







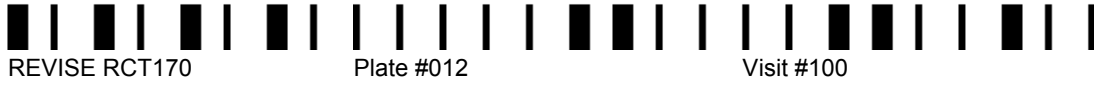

Patient ID [ ][ ][ ][ ] [1] [ ][ ][ ][ ] Patient Initials [ ][ ]

**COVID-19 - Additional Data (Form 4B - COVID)**  
(Patients treated for Covid during this REVISE hospital admission)

1. Vaccinated pre-ICU:  No  Unknown  Yes, 1 dose  Yes, 2 doses  Yes, 3 doses

2. COVID-related tests (during this index hospitalization, including pre-ICU admission)

|                          | Date (dd/mm/yyyy) |                  | Results           | Not Done                 |
|--------------------------|-------------------|------------------|-------------------|--------------------------|
| D Dimer Level (highest)  | [ ][ ]            | [ ][ ] 20 [ ][ ] | [ ][ ][ ][ ] ug/L | <input type="checkbox"/> |
| CRP Level (highest)      | [ ][ ]            | [ ][ ] 20 [ ][ ] | [ ][ ][ ][ ] mg/L | <input type="checkbox"/> |
| Ferritin Level (highest) | [ ][ ]            | [ ][ ] 20 [ ][ ] | [ ][ ][ ][ ] ug/L | <input type="checkbox"/> |

|                                                               | Not Done                 | No                       | Yes                      | Date (dd/mm/yyyy)       |                         |
|---------------------------------------------------------------|--------------------------|--------------------------|--------------------------|-------------------------|-------------------------|
| CT Scan <b>positive</b> for PE (first date scanned positive)  | <input type="checkbox"/> | <input type="checkbox"/> | <input type="checkbox"/> | [ ][ ] [ ][ ] 20 [ ][ ] | Specify location: _____ |
| US <b>positive</b> for DVT (first date scanned positive)      | <input type="checkbox"/> | <input type="checkbox"/> | <input type="checkbox"/> | [ ][ ] [ ][ ] 20 [ ][ ] | Specify location: _____ |
| US <b>positive</b> for DVT (If second DVT identified)         | <input type="checkbox"/> | <input type="checkbox"/> | <input type="checkbox"/> | [ ][ ] [ ][ ] 20 [ ][ ] | Specify location: _____ |
| Bowel Ischemia (radiographic or intraoperative documentation) | <input type="checkbox"/> | <input type="checkbox"/> | <input type="checkbox"/> | [ ][ ] [ ][ ] 20 [ ][ ] | Specify location: _____ |

3. COVID-related treatments (during this index hospitalization, including pre-ICU admission).

Please complete whether treatment given as part of a trial or not.

|                                                                           | No                       | Yes                      | Start Date (dd/mm/yyyy) |                                                                                   |
|---------------------------------------------------------------------------|--------------------------|--------------------------|-------------------------|-----------------------------------------------------------------------------------|
| Tocilizumab                                                               | <input type="checkbox"/> | <input type="checkbox"/> | [ ][ ] [ ][ ] 20 [ ][ ] |                                                                                   |
| Sarilumab                                                                 | <input type="checkbox"/> | <input type="checkbox"/> | [ ][ ] [ ][ ] 20 [ ][ ] |                                                                                   |
| Convalescent plasma                                                       | <input type="checkbox"/> | <input type="checkbox"/> | [ ][ ] [ ][ ] 20 [ ][ ] |                                                                                   |
| Oseltamivir or Remdesivir                                                 | <input type="checkbox"/> | <input type="checkbox"/> | [ ][ ] [ ][ ] 20 [ ][ ] | Oseltamivir <input type="checkbox"/> Remdesivir <input type="checkbox"/>          |
| Dexamethasone or high dose steroid                                        | <input type="checkbox"/> | <input type="checkbox"/> | [ ][ ] [ ][ ] 20 [ ][ ] | Dexamethasone <input type="checkbox"/> High dose steroid <input type="checkbox"/> |
| Statin                                                                    | <input type="checkbox"/> | <input type="checkbox"/> | [ ][ ] [ ][ ] 20 [ ][ ] |                                                                                   |
| IV Vitamin C                                                              | <input type="checkbox"/> | <input type="checkbox"/> | [ ][ ] [ ][ ] 20 [ ][ ] |                                                                                   |
| ACE2 Renin-Angiotensin RAS                                                | <input type="checkbox"/> | <input type="checkbox"/> | [ ][ ] [ ][ ] 20 [ ][ ] |                                                                                   |
| Azithromycin                                                              | <input type="checkbox"/> | <input type="checkbox"/> | [ ][ ] [ ][ ] 20 [ ][ ] |                                                                                   |
| ECMO                                                                      | <input type="checkbox"/> | <input type="checkbox"/> | [ ][ ] [ ][ ] 20 [ ][ ] |                                                                                   |
| Other (e.g., interferon, kinase inhibitors, hydroxychloroquine), specify: | <input type="checkbox"/> | <input type="checkbox"/> | [ ][ ] [ ][ ] 20 [ ][ ] |                                                                                   |

4. Tracheostomy:  No  Yes → [ ][ ] [ ][ ] 20 [ ][ ]

5. Comments: \_\_\_\_\_

Please note: Coagulation tests and anticoagulation doses are captured on Daily Data Form

29 December 2022





Form 6.2 of 2

|                                                                                                                                                                                                                       |              |                                                                                                                                                                                                                                                                                                                                                                                                                                         |
|-----------------------------------------------------------------------------------------------------------------------------------------------------------------------------------------------------------------------|--------------|-----------------------------------------------------------------------------------------------------------------------------------------------------------------------------------------------------------------------------------------------------------------------------------------------------------------------------------------------------------------------------------------------------------------------------------------|
| REVISE RCT170                                                                                                                                                                                                         | Plate #031   | Study Day <span style="border: 1px solid black; padding: 2px 10px;">  </span>                                                                                                                                                                                                                                                                                                                                                           |
| Patient ID <span style="border: 1px solid black; padding: 2px 10px;">  </span> <span style="border: 1px solid black; padding: 2px 10px;">1</span> <span style="border: 1px solid black; padding: 2px 10px;">  </span> | F L          | Date of Study Day <span style="border: 1px solid black; padding: 2px 10px;">  </span> <span style="border: 1px solid black; padding: 2px 10px;">  </span> <span style="border: 1px solid black; padding: 2px 10px;">2</span> <span style="border: 1px solid black; padding: 2px 10px;">0</span> <span style="border: 1px solid black; padding: 2px 10px;">  </span> <span style="border: 1px solid black; padding: 2px 10px;">  </span> |
| Patient Initials <span style="border: 1px solid black; padding: 2px 10px;">  </span> <span style="border: 1px solid black; padding: 2px 10px;">  </span>                                                              | (dd/mm/yyyy) |                                                                                                                                                                                                                                                                                                                                                                                                                                         |

### DAILY DATA STUDY DAYS 1-14 (Form 6.2 of 2)

#### 7. Did the patient receive any of the following today (post-randomization)?

1. H<sub>2</sub>RA
 

|                          |                          |                                                                                                                                                                                                                                                               |
|--------------------------|--------------------------|---------------------------------------------------------------------------------------------------------------------------------------------------------------------------------------------------------------------------------------------------------------|
| No                       | Yes                      |                                                                                                                                                                                                                                                               |
| <input type="checkbox"/> | <input type="checkbox"/> | [e.g., <b>cimetidine</b> (Tagamet, Magicul), <b>famotidine</b> (Pepcid, Ausfam, Pepzan), <b>ranitidine</b> (Zantac, Ausran, Ulcaid, Rani2, Peptisothe), <b>nizatidine</b> (Axid, Nizac, Tacidine, Tazac)]                                                     |
|                          | <input type="checkbox"/> | Check if H <sub>2</sub> RA given for allowable reason (i.e., GI bleeding, patient extubated or consent withdrawn)<br>(If yes and patient mechanically ventilated, submit <b>Protocol Deviation Form 12</b> for non-protocolized reason for H <sub>2</sub> RA) |
  
2. Open label PPI
 

|                          |                          |                                                                                                                                                                                                                                                                                                                                                                                                                                                                                                  |
|--------------------------|--------------------------|--------------------------------------------------------------------------------------------------------------------------------------------------------------------------------------------------------------------------------------------------------------------------------------------------------------------------------------------------------------------------------------------------------------------------------------------------------------------------------------------------|
| No                       | Yes                      |                                                                                                                                                                                                                                                                                                                                                                                                                                                                                                  |
| <input type="checkbox"/> | <input type="checkbox"/> | [e.g., <b>lansoprazole</b> (Prevacid, lanzol relief, Zoton, Zopral), <b>esomeprazole</b> (Nexium, Nexazole, Nexole, Noxicid), <b>dexlansoprazole</b> (Dexilant), <b>omeprazole</b> (Losec, Omazol relief, Dr Reddy's Omeprazole, Midwest, Omazol IV, Acimax, Meprazole, Omepral, Ozmep, Maxor, Pemzo, Probitor), <b>pantoprazole</b> (Pantoloc, Tecta, Panzop relief, Somac, Salpraz, Gastenz, Ozpan, Panto, Pantofast, Panthron), <b>rabeprazole</b> (Pariet, Parbezol, Parzole, Razit, Zabep)] |
|                          | <input type="checkbox"/> | Check if PPI given for allowable reason (i.e., GI bleeding, patient extubated or consent withdrawn)<br>(If yes and patient mechanically ventilated, submit <b>Protocol Deviation Form 12</b> for non-protocolized reason for open-label PPI)                                                                                                                                                                                                                                                     |
  
3. Other stress ulcer prophylaxis
 

|                          |                          |                                                                 |
|--------------------------|--------------------------|-----------------------------------------------------------------|
| No                       | Yes                      |                                                                 |
| <input type="checkbox"/> | <input type="checkbox"/> | [e.g., sulcrafate (Carafate), antacid (e.g., Maalox, Gaviscon)] |
  
4. Anticoagulant or antiplatelet agent
 

|                                                                                                                                                                                                                                    | Prophylactic<br>Dose     | Intermediate<br>Dose     | Therapeutic<br>Dose      |                                                                                                             |
|------------------------------------------------------------------------------------------------------------------------------------------------------------------------------------------------------------------------------------|--------------------------|--------------------------|--------------------------|-------------------------------------------------------------------------------------------------------------|
| <input type="checkbox"/> Unfractionated heparin, specify: →                                                                                                                                                                        | <input type="checkbox"/> | <input type="checkbox"/> | <input type="checkbox"/> | <input type="checkbox"/> None                                                                               |
| <input type="checkbox"/> Low molecular weight heparin, specify: →                                                                                                                                                                  | <input type="checkbox"/> | <input type="checkbox"/> | <input type="checkbox"/> |                                                                                                             |
| <input type="checkbox"/> Warfarin (Coumadin)                                                                                                                                                                                       |                          |                          |                          | <input type="checkbox"/> Non-steroid anti-inflammatory drug (NSAID)                                         |
| <input type="checkbox"/> Aspirin (ASA), specify: <input type="checkbox"/> ≤ 325mg daily <input type="checkbox"/> > 325mg daily                                                                                                     |                          |                          |                          | <input type="checkbox"/> New oral anticoagulants (NOAC) (e.g., Rivaroxiban, Apixaban, Dabigatran, Edoxaban) |
| <input type="checkbox"/> Clopidogrel (Plavix)                                                                                                                                                                                      |                          |                          |                          |                                                                                                             |
| <input type="checkbox"/> Others [e.g., Dipyridamole (Persantine), Ticlopidine (Ticlid), Tirofiban (Aggrastat), Eptifatide (Integrilin), Direct thrombin inhibitors (Bivalirudin), Prasugrel, Ticagrelor, Cangrelor] specify: _____ |                          |                          |                          |                                                                                                             |
  
5. Oral or IV corticosteroids (e.g., prednisone, hydrocortisone, solumedrol, dexamethasone)
 

|                          |                          |                          |                          |
|--------------------------|--------------------------|--------------------------|--------------------------|
| No                       | Yes, specify:            | IV                       | Oral                     |
| <input type="checkbox"/> | <input type="checkbox"/> | <input type="checkbox"/> | <input type="checkbox"/> |
  
6. Probiotics
 

|                          |                          |                                          |
|--------------------------|--------------------------|------------------------------------------|
| No                       | Yes                      |                                          |
| <input type="checkbox"/> | <input type="checkbox"/> | If open-label probiotics, specify: _____ |

#### 8. Was there an adverse event today believed by either the ICU physician or Site Investigator to be directly related to enrolment in the study?

- |                          |                          |                                                                                                                                                                                                                                                                            |
|--------------------------|--------------------------|----------------------------------------------------------------------------------------------------------------------------------------------------------------------------------------------------------------------------------------------------------------------------|
| <input type="checkbox"/> | <input type="checkbox"/> | If yes, please notify the REVISE Methods Center <b>within 24 hours</b> of becoming aware of the Adverse Event. An <b>Adverse Event Directly Related to the Study Form 17</b> is required and please ask the ICU physician to sign it and send to the REVISE Methods Center |
| No                       | Yes                      |                                                                                                                                                                                                                                                                            |

#### 9. Was today the last day of study daily data collection?

- |                          |                                                                                                                 |
|--------------------------|-----------------------------------------------------------------------------------------------------------------|
| <input type="checkbox"/> | No                                                                                                              |
| <input type="checkbox"/> | Yes, patient died, was discharged to the ward, or drug stopped at 90 days (submit <b>Final Status Form 14</b> ) |
| <input type="checkbox"/> | Yes, consent withdrawn for further data collection (submit a <b>Final Status Form 14</b> )                      |

29 December 2022

## Form 7

REVERSE RCT170                      Plate #033                      Study Day     

Patient ID          1               Patient Initials           Date of Study Day           20     (dd/mm/yyyy)

**DAILY DATA STUDY DAYS 15-90 (Form 7)****1. Advanced life support strategies received today**

1. Invasive mechanical ventilation                       No     Yes
2. Non-invasive mechanical ventilation (BiPAP):                       No     Yes
3. Inotropes or vasopressor infusions                       No     Yes  
(e.g., dopamine, norepinephrine, phenylephrine, epinephrine, milrinone, dobutamine, vasopressin)
4. Was renal replacement therapy used today?  
 No     Yes, specify: →  intermittent (IHD)     sustained low efficiency (SLED)  
 continuous (CRRT)     peritoneal

**2. Laboratory results today:**

          N/A              N/A          N/A          N/A              N/A              N/A

hemoglobin (g/L) (lowest)    platelets (x10<sup>9</sup>/L) (lowest)    INR (highest)    PTT (s) (highest)    creatinine (umol/L) (highest)

**3. Was study drug administered today?**

No     Yes, specify:

If a dose was not received today, please indicate why and submit a **Protocol Deviation Form 12** if applicable:

- Discharged from ICU or died                       GI bleeding (submit **Bleed Form 9**)
- Not mechanically ventilated (ICU physician discretion)  
**If patient re-intubated during this ICU admission, restart REVISE study drug.**                       Error, missed/probably missed dose (submit **Protocol Deviation Form 12**)
- No IV access                       Patient declined dose
- Expected to die, palliative measures only                       Consent withdrawn, drug stopped (continue data collection)
- Suspected/proven diagnosis of an other exclusion criterion, specify: \_\_\_\_\_  
 Other, specify: \_\_\_\_\_

**4. Any enteral, parenteral or oral nutrition today?**

No     Yes, specify:  Enteral →           
 Parenteral →           
 Oral                       Oral                                
total daily ml

**5. Was anticoagulation received today?**

No     Yes, specify →  Intermediate dose  
 Full therapeutic dose  
 Prophylactic dose

**6. Post randomization, did any of the following outcomes occur today?**

- Major gastrointestinal bleeding     No     Yes, please complete the **Bleeding Outcome Form 9**  
(Complete only one form for each discrete new major bleeding event documented)
- Clostridioides difficile* infection     No     Yes, please complete the ***Clostridioides Difficile* Outcome Form 10**
- Respiratory infection                       No     Yes, please complete the **Respiratory Infection Outcome Form 11**  
(Complete Form with new events only)

**7. Was there an adverse event today believed by either the ICU physician or Site Investigator to be directly related to enrolment in the study?**

No     Yes    If yes, please notify the REVISE Methods Center **within 24 hours** of becoming aware of the Adverse Event. An **Adverse Event Directly Related to the Study Form 17** is required and please ask the ICU physician to sign it and send to the REVISE Methods Center

**8. Was today the last day of study daily data collection?**

- No
- Yes, patient died, was discharged to the ward, or drug stopped at 90 days (submit **Final Status Form 14**)
- Yes, consent withdrawn for further data collection (submit a **Final Status Form 14**)



Form 9

REVISION RCT170 Plate #040

Study Day [ ][ ] [ ][ ]

Patient ID [ ][ ][ ][ ] 1 [ ][ ][ ][ ] Patient Initials [ ][ ] F L Date of Study Day [ ][ ][ ][ ] (dd/mm/yyyy) 20 [ ][ ][ ][ ]

GASTROINTESTINAL BLEEDING OUTCOME (Form 9)

- 1. Bleeding presentation (check ALL that apply): NG blood, Hematemesis (vomiting blood), NG Coffee ground emesis, Hematochezia (bright red blood per rectum), Melena, Other, specify:

- 2. Bleeding severity (check ALL that apply): Life threatening bleeding resulting in hypovolemic shock, Clinically important bleeding is overt bleeding and one of the following within 24 hours in the absence of other causes (e.g., sepsis, propofol bolus): Decrease in Hgb >=20 g/L, PRBC >= 2 units, Decrease in SBP >= 20mmHg or HR increase >= 20bpm, Initiation of vasopressor, Increase of vasopressor, Other (specify):

- 3. Bleeding that requires an invasive intervention specify: Upper GI diagnostic endoscopy, specify findings: gastric ulcer, gastritis/erosions, gastric varices, Portal hypertensive gastropathy, duodenal ulcer, duodenitis/erosions, duodenal varices, Normal, esophageal ulcer, esophagitis/erosions, esophageal varices, Helicobacter pylori, Other, specify: Upper GI therapeutic endoscopy, specify interventions: injection, banding, argon plasma coagulation, clips, thermal coagulation, Blakemore/Minnesota tube, hemospray, glue, Other, specify: Colonoscopy, Sigmoidoscopy, Angiogram, Angiogram with embolization/coiling, Surgery, specify: Other, specify:

Helicobacter pylori serology positive? No Yes

3. Bleed Started: unknown TO Bleed Stopped: unknown bleeding ongoing [ ][ ][ ][ ] 20 [ ][ ][ ][ ] TO [ ][ ][ ][ ] 20 [ ][ ][ ][ ] Date (dd/mm/yyyy)

- 4. Direct consequences of the bleeding event (check ALL that apply): Total transfusion (total # units infused): RBC, FFP, platelets, cryoprecipitate, Drugs: PPI, Octreotide, Tranexamic acid, desmopressin (DDAVP), Other, specify: Major morbidity (e.g., myocardial infarction, stroke), specify: Death NONE

5. Reports sent to the REVISE Methods Center (check ALL that apply): Endoscopy, Surgical, Radiology, Clinical Notes Reports not sent, Investigator review only: [ ][ ][ ][ ] 20 [ ][ ][ ][ ] Date Investigator reviewed (dd/mm/yyyy)

Reviewing Investigator Name Investigator Signature



|                                                                                                                                                                                                                                                                                                              |                                                                                                                                                                                                                                                                                                                                                                              |                                                                                                                                                                                                                                                              |                                                                                                                                                                                                                                                                                                                                                                 |
|--------------------------------------------------------------------------------------------------------------------------------------------------------------------------------------------------------------------------------------------------------------------------------------------------------------|------------------------------------------------------------------------------------------------------------------------------------------------------------------------------------------------------------------------------------------------------------------------------------------------------------------------------------------------------------------------------|--------------------------------------------------------------------------------------------------------------------------------------------------------------------------------------------------------------------------------------------------------------|-----------------------------------------------------------------------------------------------------------------------------------------------------------------------------------------------------------------------------------------------------------------------------------------------------------------------------------------------------------------|
|                                                                                                                                                                                                                                                                                                              |                                                                                                                                                                                                                                                                                                                                                                              | Study Day                                                                                                                                                                                                                                                    | <input style="width: 20px; height: 20px;" type="text"/> <input style="width: 20px; height: 20px;" type="text"/>                                                                                                                                                                                                                                                 |
|                                                                                                                                                                                                                                                                                                              | REVISE RCT170                                                                                                                                                                                                                                                                                                                                                                | Plate #050                                                                                                                                                                                                                                                   | F L                                                                                                                                                                                                                                                                                                                                                             |
| Patient ID                                                                                                                                                                                                                                                                                                   | <input style="width: 20px; height: 20px;" type="text"/>                              | Patient Initials                                                                                                                                                                                                                                             | <input style="width: 20px; height: 20px;" type="text"/> <input style="width: 20px; height: 20px;" type="text"/>                                                                                                                                                                                                                                                 |
| <b>RESPIRATORY INFECTION OUTCOME (Form 11)</b>                                                                                                                                                                                                                                                               |                                                                                                                                                                                                                                                                                                                                                                              |                                                                                                                                                                                                                                                              |                                                                                                                                                                                                                                                                                                                                                                 |
| <b>2 Days Prior to Respiratory Infection:</b><br>(~ 24-48 hour period Pre-Resp Infection day reported)                                                                                                                                                                                                       |                                                                                                                                                                                                                                                                                                                                                                              |                                                                                                                                                                                                                                                              | <input style="width: 20px; height: 20px;" type="text"/> <input style="width: 20px; height: 20px;" type="text"/><br>(dd/mm/yyyy) |
| <input type="checkbox"/> N/A, data unavailable pt not in hospital                                                                                                                                                                                                                                            |                                                                                                                                                                                                                                                                                                                                                                              |                                                                                                                                                                                                                                                              |                                                                                                                                                                                                                                                                                                                                                                 |
| Highest temp °C                                                                                                                                                                                                                                                                                              | Highest WBC count (10 <sup>9</sup> /L)                                                                                                                                                                                                                                                                                                                                       | Lowest PaO <sub>2</sub> /FIO <sub>2</sub>                                                                                                                                                                                                                    | New, progressive or persistent CXR infiltrate? (Check ALL that apply)<br><input type="checkbox"/> None or no CXR<br><input type="checkbox"/> Patchy/diffuse<br><input type="checkbox"/> Lobar/bilobar<br><input type="checkbox"/> Consolidation<br><input type="checkbox"/> Cavitation                                                                          |
| <input style="width: 20px; height: 20px;" type="text"/> <input style="width: 20px; height: 20px;" type="text"/> <input style="width: 20px; height: 20px;" type="text"/> <input type="checkbox"/> N/A<br><input type="checkbox"/> PO <input type="checkbox"/> Ax or Tymp <input type="checkbox"/> Core/Rectal | <input style="width: 20px; height: 20px;" type="text"/> <input type="checkbox"/> N/A | <input style="width: 20px; height: 20px;" type="text"/> <input type="checkbox"/> N/A |                                                                                                                                                                                                                                                                                                                                                                 |
| Lowest temp °C                                                                                                                                                                                                                                                                                               | Lowest WBC count (10 <sup>9</sup> /L)                                                                                                                                                                                                                                                                                                                                        | Tracheal secretions:                                                                                                                                                                                                                                         | Potential Pathogen cultured? <input type="checkbox"/> No <input type="checkbox"/> Yes<br>Nasopharyngeal swab (NPS) positive? <input type="checkbox"/> No <input type="checkbox"/> Yes                                                                                                                                                                           |
| <input style="width: 20px; height: 20px;" type="text"/> <input style="width: 20px; height: 20px;" type="text"/> <input style="width: 20px; height: 20px;" type="text"/> <input type="checkbox"/> N/A<br><input type="checkbox"/> PO <input type="checkbox"/> Ax or Tymp <input type="checkbox"/> Core/Rectal | <input style="width: 20px; height: 20px;" type="text"/> <input type="checkbox"/> N/A | <input type="checkbox"/> None/minimal<br><input type="checkbox"/> Moderate<br><input type="checkbox"/> Large<br>Purulent or mucopurulent?<br><input type="checkbox"/> No <input type="checkbox"/> Yes                                                        |                                                                                                                                                                                                                                                                                                                                                                 |
|                                                                                                                                                                                                                                                                                                              | Bands present? <input type="checkbox"/> No <input type="checkbox"/> Yes                                                                                                                                                                                                                                                                                                      |                                                                                                                                                                                                                                                              |                                                                                                                                                                                                                                                                                                                                                                 |
|                                                                                                                                                                                                                                                                                                              | ARDS present? <input type="checkbox"/> No <input type="checkbox"/> Yes                                                                                                                                                                                                                                                                                                       |                                                                                                                                                                                                                                                              |                                                                                                                                                                                                                                                                                                                                                                 |
| <b>1 Day Prior to Respiratory Infection:</b><br>(~ 24 hour period Pre-Resp Infection day reported)                                                                                                                                                                                                           |                                                                                                                                                                                                                                                                                                                                                                              |                                                                                                                                                                                                                                                              | <input style="width: 20px; height: 20px;" type="text"/> <input style="width: 20px; height: 20px;" type="text"/><br>(dd/mm/yyyy) |
| <input type="checkbox"/> N/A, data unavailable pt not in hospital                                                                                                                                                                                                                                            |                                                                                                                                                                                                                                                                                                                                                                              |                                                                                                                                                                                                                                                              |                                                                                                                                                                                                                                                                                                                                                                 |
| Highest temp °C                                                                                                                                                                                                                                                                                              | Highest WBC count (10 <sup>9</sup> /L)                                                                                                                                                                                                                                                                                                                                       | Lowest PaO <sub>2</sub> /FIO <sub>2</sub>                                                                                                                                                                                                                    | New, progressive or persistent CXR infiltrate? (Check ALL that apply)<br><input type="checkbox"/> None or no CXR<br><input type="checkbox"/> Patchy/diffuse<br><input type="checkbox"/> Lobar/bilobar<br><input type="checkbox"/> Consolidation<br><input type="checkbox"/> Cavitation                                                                          |
| <input style="width: 20px; height: 20px;" type="text"/> <input style="width: 20px; height: 20px;" type="text"/> <input style="width: 20px; height: 20px;" type="text"/> <input type="checkbox"/> N/A<br><input type="checkbox"/> PO <input type="checkbox"/> Ax or Tymp <input type="checkbox"/> Core/Rectal | <input style="width: 20px; height: 20px;" type="text"/> <input type="checkbox"/> N/A | <input style="width: 20px; height: 20px;" type="text"/> <input type="checkbox"/> N/A |                                                                                                                                                                                                                                                                                                                                                                 |
| Lowest temp °C                                                                                                                                                                                                                                                                                               | Lowest WBC count (10 <sup>9</sup> /L)                                                                                                                                                                                                                                                                                                                                        | Tracheal secretions:                                                                                                                                                                                                                                         | Potential Pathogen cultured? <input type="checkbox"/> No <input type="checkbox"/> Yes<br>Nasopharyngeal swab (NPS) positive? <input type="checkbox"/> No <input type="checkbox"/> Yes                                                                                                                                                                           |
| <input style="width: 20px; height: 20px;" type="text"/> <input style="width: 20px; height: 20px;" type="text"/> <input style="width: 20px; height: 20px;" type="text"/> <input type="checkbox"/> N/A<br><input type="checkbox"/> PO <input type="checkbox"/> Ax or Tymp <input type="checkbox"/> Core/Rectal | <input style="width: 20px; height: 20px;" type="text"/> <input type="checkbox"/> N/A | <input type="checkbox"/> None/minimal<br><input type="checkbox"/> Moderate<br><input type="checkbox"/> Large<br>Purulent or mucopurulent?<br><input type="checkbox"/> No <input type="checkbox"/> Yes                                                        |                                                                                                                                                                                                                                                                                                                                                                 |
|                                                                                                                                                                                                                                                                                                              | Bands present? <input type="checkbox"/> No <input type="checkbox"/> Yes                                                                                                                                                                                                                                                                                                      |                                                                                                                                                                                                                                                              |                                                                                                                                                                                                                                                                                                                                                                 |
|                                                                                                                                                                                                                                                                                                              | ARDS present? <input type="checkbox"/> No <input type="checkbox"/> Yes                                                                                                                                                                                                                                                                                                       |                                                                                                                                                                                                                                                              |                                                                                                                                                                                                                                                                                                                                                                 |
| <b>DAY OF RESPIRATORY INFECTION:</b>                                                                                                                                                                                                                                                                         |                                                                                                                                                                                                                                                                                                                                                                              |                                                                                                                                                                                                                                                              | <input style="width: 20px; height: 20px;" type="text"/> <input style="width: 20px; height: 20px;" type="text"/><br>(dd/mm/yyyy) |
| <input type="checkbox"/> N/A, data unavailable pt not in hospital                                                                                                                                                                                                                                            |                                                                                                                                                                                                                                                                                                                                                                              |                                                                                                                                                                                                                                                              |                                                                                                                                                                                                                                                                                                                                                                 |
| Highest temp °C                                                                                                                                                                                                                                                                                              | Highest WBC count (10 <sup>9</sup> /L)                                                                                                                                                                                                                                                                                                                                       | Lowest PaO <sub>2</sub> /FIO <sub>2</sub>                                                                                                                                                                                                                    | New, progressive or persistent CXR infiltrate? (Check ALL that apply)<br><input type="checkbox"/> None or no CXR<br><input type="checkbox"/> Patchy/diffuse<br><input type="checkbox"/> Lobar/bilobar<br><input type="checkbox"/> Consolidation<br><input type="checkbox"/> Cavitation                                                                          |
| <input style="width: 20px; height: 20px;" type="text"/> <input style="width: 20px; height: 20px;" type="text"/> <input style="width: 20px; height: 20px;" type="text"/> <input type="checkbox"/> N/A<br><input type="checkbox"/> PO <input type="checkbox"/> Ax or Tymp <input type="checkbox"/> Core/Rectal | <input style="width: 20px; height: 20px;" type="text"/> <input type="checkbox"/> N/A | <input style="width: 20px; height: 20px;" type="text"/> <input type="checkbox"/> N/A |                                                                                                                                                                                                                                                                                                                                                                 |
| Lowest temp °C                                                                                                                                                                                                                                                                                               | Lowest WBC count (10 <sup>9</sup> /L)                                                                                                                                                                                                                                                                                                                                        | Tracheal secretions:                                                                                                                                                                                                                                         | Potential Pathogen cultured? <input type="checkbox"/> No <input type="checkbox"/> Yes<br>Nasopharyngeal swab (NPS) positive? <input type="checkbox"/> No <input type="checkbox"/> Yes                                                                                                                                                                           |
| <input style="width: 20px; height: 20px;" type="text"/> <input style="width: 20px; height: 20px;" type="text"/> <input style="width: 20px; height: 20px;" type="text"/> <input type="checkbox"/> N/A<br><input type="checkbox"/> PO <input type="checkbox"/> Ax or Tymp <input type="checkbox"/> Core/Rectal | <input style="width: 20px; height: 20px;" type="text"/> <input type="checkbox"/> N/A | <input type="checkbox"/> None/minimal<br><input type="checkbox"/> Moderate<br><input type="checkbox"/> Large<br>Purulent or mucopurulent?<br><input type="checkbox"/> No <input type="checkbox"/> Yes                                                        |                                                                                                                                                                                                                                                                                                                                                                 |
|                                                                                                                                                                                                                                                                                                              | Bands present? <input type="checkbox"/> No <input type="checkbox"/> Yes                                                                                                                                                                                                                                                                                                      |                                                                                                                                                                                                                                                              |                                                                                                                                                                                                                                                                                                                                                                 |
|                                                                                                                                                                                                                                                                                                              | ARDS present? <input type="checkbox"/> No <input type="checkbox"/> Yes                                                                                                                                                                                                                                                                                                       |                                                                                                                                                                                                                                                              |                                                                                                                                                                                                                                                                                                                                                                 |
| <b>24 hours POST Respiratory Infection:</b>                                                                                                                                                                                                                                                                  |                                                                                                                                                                                                                                                                                                                                                                              |                                                                                                                                                                                                                                                              | <input style="width: 20px; height: 20px;" type="text"/> <input style="width: 20px; height: 20px;" type="text"/><br>(dd/mm/yyyy) |
| <input type="checkbox"/> N/A, data unavailable pt not in hospital                                                                                                                                                                                                                                            |                                                                                                                                                                                                                                                                                                                                                                              |                                                                                                                                                                                                                                                              |                                                                                                                                                                                                                                                                                                                                                                 |
| Highest temp °C                                                                                                                                                                                                                                                                                              | Highest WBC count (10 <sup>9</sup> /L)                                                                                                                                                                                                                                                                                                                                       | Lowest PaO <sub>2</sub> /FIO <sub>2</sub>                                                                                                                                                                                                                    | New, progressive or persistent CXR infiltrate? (Check ALL that apply)<br><input type="checkbox"/> None or no CXR<br><input type="checkbox"/> Patchy/diffuse<br><input type="checkbox"/> Lobar/bilobar<br><input type="checkbox"/> Consolidation<br><input type="checkbox"/> Cavitation                                                                          |
| <input style="width: 20px; height: 20px;" type="text"/> <input style="width: 20px; height: 20px;" type="text"/> <input style="width: 20px; height: 20px;" type="text"/> <input type="checkbox"/> N/A<br><input type="checkbox"/> PO <input type="checkbox"/> Ax or Tymp <input type="checkbox"/> Core/Rectal | <input style="width: 20px; height: 20px;" type="text"/> <input type="checkbox"/> N/A | <input style="width: 20px; height: 20px;" type="text"/> <input type="checkbox"/> N/A |                                                                                                                                                                                                                                                                                                                                                                 |
| Lowest temp °C                                                                                                                                                                                                                                                                                               | Lowest WBC count (10 <sup>9</sup> /L)                                                                                                                                                                                                                                                                                                                                        | Tracheal secretions:                                                                                                                                                                                                                                         | Potential Pathogen cultured? <input type="checkbox"/> No <input type="checkbox"/> Yes<br>Nasopharyngeal swab (NPS) positive? <input type="checkbox"/> No <input type="checkbox"/> Yes                                                                                                                                                                           |
| <input style="width: 20px; height: 20px;" type="text"/> <input style="width: 20px; height: 20px;" type="text"/> <input style="width: 20px; height: 20px;" type="text"/> <input type="checkbox"/> N/A<br><input type="checkbox"/> PO <input type="checkbox"/> Ax or Tymp <input type="checkbox"/> Core/Rectal | <input style="width: 20px; height: 20px;" type="text"/> <input type="checkbox"/> N/A | <input type="checkbox"/> None/minimal<br><input type="checkbox"/> Moderate<br><input type="checkbox"/> Large<br>Purulent or mucopurulent?<br><input type="checkbox"/> No <input type="checkbox"/> Yes                                                        |                                                                                                                                                                                                                                                                                                                                                                 |
|                                                                                                                                                                                                                                                                                                              | Bands present? <input type="checkbox"/> No <input type="checkbox"/> Yes                                                                                                                                                                                                                                                                                                      |                                                                                                                                                                                                                                                              |                                                                                                                                                                                                                                                                                                                                                                 |
|                                                                                                                                                                                                                                                                                                              | ARDS present? <input type="checkbox"/> No <input type="checkbox"/> Yes                                                                                                                                                                                                                                                                                                       | Calculated REVISE Methods Center CPIS Score: <input style="width: 20px; height: 20px;" type="text"/>                                                                                                                                                         |                                                                                                                                                                                                                                                                                                                                                                 |

Form 5.1

REVISE RCT170

Plate #015

Visit #000

Patient ID [ ][ ] [ ] 1 [ ][ ] [ ][ ]

Patient Initials [ ][ ]

No cultures performed

**CULTURE REPORT (Form 5.1)**

Please list all gram stains and cultures performed in the ICU related to Pulmonary Infections (including from sputum, endotracheal aspirate, bronchoscopy, pleural fluid, nasopharyngeal swab for virus, urine Legionella) and blood culture considered to be related to the pneumonia (i.e., Same organism identified in blood and respiratory specimen).

|    | Date of Specimen (dd/mm/yyyy) | Result                                                              | Organism Code(s) (Please list all today)<br>If more than 3 organisms to report, use additional line. |
|----|-------------------------------|---------------------------------------------------------------------|------------------------------------------------------------------------------------------------------|
| 1. | [ ][ ] [ ][ ] 20 [ ][ ]       | <input type="checkbox"/> positive <input type="checkbox"/> negative | [ ][ ][ ][ ] [ ][ ][ ][ ] [ ][ ][ ][ ]                                                               |
|    | Specify Location [ ][ ]       |                                                                     |                                                                                                      |
| 2. | [ ][ ] [ ][ ] 20 [ ][ ]       | <input type="checkbox"/> positive <input type="checkbox"/> negative | [ ][ ][ ][ ] [ ][ ][ ][ ] [ ][ ][ ][ ]                                                               |
|    | Specify Location [ ][ ]       |                                                                     |                                                                                                      |
| 3. | [ ][ ] [ ][ ] 20 [ ][ ]       | <input type="checkbox"/> positive <input type="checkbox"/> negative | [ ][ ][ ][ ] [ ][ ][ ][ ] [ ][ ][ ][ ]                                                               |
|    | Specify Location [ ][ ]       |                                                                     |                                                                                                      |
| 4. | [ ][ ] [ ][ ] 20 [ ][ ]       | <input type="checkbox"/> positive <input type="checkbox"/> negative | [ ][ ][ ][ ] [ ][ ][ ][ ] [ ][ ][ ][ ]                                                               |
|    | Specify Location [ ][ ]       |                                                                     |                                                                                                      |
| 5. | [ ][ ] [ ][ ] 20 [ ][ ]       | <input type="checkbox"/> positive <input type="checkbox"/> negative | [ ][ ][ ][ ] [ ][ ][ ][ ] [ ][ ][ ][ ]                                                               |
|    | Specify Location [ ][ ]       |                                                                     |                                                                                                      |
| 6. | [ ][ ] [ ][ ] 20 [ ][ ]       | <input type="checkbox"/> positive <input type="checkbox"/> negative | [ ][ ][ ][ ] [ ][ ][ ][ ] [ ][ ][ ][ ]                                                               |
|    | Specify Location [ ][ ]       |                                                                     |                                                                                                      |
| 7. | [ ][ ] [ ][ ] 20 [ ][ ]       | <input type="checkbox"/> positive <input type="checkbox"/> negative | [ ][ ][ ][ ] [ ][ ][ ][ ] [ ][ ][ ][ ]                                                               |
|    | Specify Location [ ][ ]       |                                                                     |                                                                                                      |

Please check if additional forms are required for reporting positive cultures

29 December 2022

Form 12

REVISIONS: [12 bars] REVISE RCT170 Plate #070

Study Day [ ][ ]

Patient ID [ ][ ][ ] 1 [ ][ ][ ]

Patient Initials [ ][ ] F L

Date of Study Day [ ][ ][ ][ ] 20 [ ][ ][ ]

**PROTOCOL DEVIATION - RESEARCH COORDINATOR REPORT (Form 12)**

**1. Protocol deviation (check ALL that apply)**

- 1. Randomization of ineligible patient (only submit to local REB upon review with Methods Center and as per local guidelines)
- 2. Missed dose of study drug
- 3. Received wrong study drug
- 4. Open label PPI administered (e.g., not study drug)
- 5. H<sub>2</sub>RA administered
- 6. Other (specify): \_\_\_\_\_

**2. Explanation:** \_\_\_\_\_

**3. Were there any consequences to the patient?**  No  Yes, specify: \_\_\_\_\_

**4. Actions taken, specify:** \_\_\_\_\_

29 December 2022





Form 14

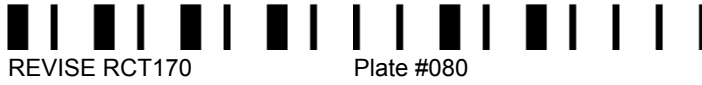

Study Day

Patient ID  1  Patient Initials

FINAL STATUS (Form 14)

1. Patient discharged from ICU?

Form for question 1: Patient discharged from ICU? Includes checkboxes for 'Yes, survived ICU', 'No, died in ICU', and 'Unknown', along with date fields for ICU Discharge and Date of Death.

Proximate cause of death in ICU (select one option)  Other, specify: \_\_\_\_\_

Underlying cause of death in ICU (select up to 3 options)  Other, specify: \_\_\_\_\_

2. Patient READMITTED to ICU during this index hospital admission?

(NOTE: No need to restart study drug with patient ICU readmission)

If yes, was readmission for Upper GI bleeding?

Form for question 2: Patient readmitted to ICU. Includes checkboxes for 'No' and 'Yes', and date fields for ICU Readmission and ICU Discharge.

If Yes, patient readmitted to ICU for upper GI bleeding, please complete Gastrointestinal Bleeding Outcome Form 9)

3. Patient discharged from Hospital?

Form for question 3: Patient discharged from Hospital? Includes checkboxes for 'Yes, survived' and 'No, died', and date fields for Hospital Discharge and Date of Death.

- Yes, home
Yes, acute care facility (non-REVISE site)
Yes, long term care facility
Yes, rehabilitation center
Other, specify: \_\_\_\_\_

Proximate cause of death in hospital (select one option)

Other, specify: \_\_\_\_\_

Underlying cause of death in hospital (select up to 3 options)

Other, specify: \_\_\_\_\_

4. Was this patient confirmed COVID positive anytime from hospital admission up to hospital discharge?

Form for question 4: Was this patient confirmed COVID positive? Includes checkboxes for 'Yes' and 'No', and a date field for 'Date confirmed positive, if applicable'.

5. Vital status at 90 days following randomization?

Form for question 5: Vital status at 90 days. Includes checkboxes for 'Alive' and 'Deceased', and a list of methods for obtaining vital status.

- Home
Study hospital
Chronic care, long term care facility
Other acute care facility (non-REVISE site)
Palliative care hospital or facility
Inpatient rehabilitation center
Other, specify: \_\_\_\_\_

Date of contact (dd/mm/yyyy)

Date of Death, if applicable (dd/mm/yyyy)

REVISION RCT170

Plate #095

Visit #000

Patient ID

F L  
Patient Initials

**COENROLMENT (Form 15)**

1. Was patient coenrolled in another study in ICU?  No  Yes, please specify name, design and funding:

| Study name: | Design:                  |                          | Funding:                 |                          |                          | Informed Consent<br>1 = A priori<br>2 = Deferred<br>3 = Waived | Consent Timing<br>1 = REVISE 1st<br>2 = Concurrent<br>3 = REVISE after | Methods Center<br>Internal<br>Study Code                       |
|-------------|--------------------------|--------------------------|--------------------------|--------------------------|--------------------------|----------------------------------------------------------------|------------------------------------------------------------------------|----------------------------------------------------------------|
|             | RCT                      | observ                   | academic                 | industry                 | local                    |                                                                |                                                                        |                                                                |
| a. _____    | <input type="checkbox"/>                                       | <input type="checkbox"/>                                               | <input type="text"/> <input type="text"/> <input type="text"/> |
| b. _____    | <input type="checkbox"/>                                       | <input type="checkbox"/>                                               | <input type="text"/> <input type="text"/> <input type="text"/> |
| c. _____    | <input type="checkbox"/>                                       | <input type="checkbox"/>                                               | <input type="text"/> <input type="text"/> <input type="text"/> |
| d. _____    | <input type="checkbox"/>                                       | <input type="checkbox"/>                                               | <input type="text"/> <input type="text"/> <input type="text"/> |
| e. _____    | <input type="checkbox"/>                                       | <input type="checkbox"/>                                               | <input type="text"/> <input type="text"/> <input type="text"/> |



Form 17.1 of 3

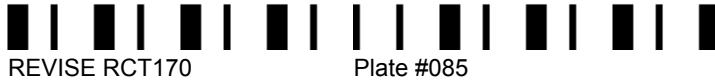

Study Day

Patient ID  1  Patient Initials  F  L Date of Study Day   20

ADVERSE EVENT - DIRECTLY RELATED TO THE STUDY (Form 17.1 of 3)

1. Onset date and time of Adverse Event:     20   /   :   (24 hour clock)  Unknown

2. Type of Event:  Adverse Drug Reaction (ADR)  Serious Adverse Drug Reaction (SADR)  Suspected Unexpected Serious Adverse Reaction (SUSAR)

3. Was the event attributed to any of the following outcomes (check ALL that apply)
 Death
 Life threatening (i.e., immediate risk of death)
 Prolongation of this hospitalization
 Persistent or significant disability or incapacity
 Congenital anomaly or birth defect
 Medically significant and may require intervention (treatment) to prevent one of the prior outcomes, specify:
 Adverse Drug Reaction only, no other conditions judged as serious (ADR)

4. Description of event or diagnosis: \_\_\_\_\_

5. Relationship to study treatment: (In the opinion of the Attending Physician or Site Investigator)  Possibly Related  Probably Related  Definitely Related

6. Date and time study drug last administered:     20   /   :   (24 hour clock)

7. Action taken regarding the study treatment (check ALL that apply)
 None required
 Study drug interrupted, specify when resumed     20   /   :   (24 hour clock)
 Study drug permanently discontinued

8. Overall outcome of the event, at time of hospital discharge or death (check one only)
 Recovered spontaneously, specify date of resolution:     20  
 Recovered with treatment, specify date of resolution:     20  
 Recovered with sequelae (specify): \_\_\_\_\_
 Death, specify date and time:     20   /   :   (24 hour clock)
 No resolution (ongoing), specify: \_\_\_\_\_
 Unknown



Form 17.3 of 3

REVISION RCT170 Plate #086

Study Day

Patient ID 1 Patient Initials F L

ADVERSE EVENT - DIRECTLY RELATED TO THE STUDY (Form 17.3 of 3)

10. Potential confounding factors/relevant medical history:

11. Was the study treatment unblinded? No Yes, please complete the Code Break Form 18

12. Does the Investigator or Site Investigator believe that this event is directly related to the REVISE study drug? No Yes, specify reason:

13. Reporter Name: Reporter Signature:

Reporter Designation: Reporter Telephone:

Date of Report: Date (dd/mm/yyyy) 20 Methods Center Contacted? No Yes

14. I have reviewed this report and agree with its contents

ICU Physician name ICU Physician signature Date (dd/mm/yyyy) 20

Site Investigator name Site Investigator signature Date (dd/mm/yyyy) 20

Please fax (+1-905-308-7223) or scan this form immediately to the REVISE Methods Center at REVISE@stjosham.on.ca and call the REVISE Methods Center (+1-905-512-5935)
