# Supplementary material for: REVISE: Re-Evaluating the Inhibition of Stress Erosions in the ICU: a randomised trial protocol
Source: PubMed Central journal article supplement — BMJ Open. 2023 Nov 15;13(11):e075588. doi: 10.1136/bmjopen-2023-075588 (PMC10660838; doi:10.1136/bmjopen-2023-075588), 2023-11-15
Supplement: bmjopen-2023-075588supp002.pdf [file bmjopen-2023-075588supp002.pdf]

Form 2

REVISE RCT170

Plate #003

Visit #000

F L

Patient ID [ ][ ][ ][ ] 1 [ ][ ][ ][ ]

Patient Initials [ ][ ]

CONSENT (Form 2)

1. Consent Encounter

A. Consent timing:

[ ] A priori (pre-randomization) [ ] Deferred

B. Consent request by:

[ ] Research Coordinator [ ] Site Investigator [ ] ICU Physician

2. Was verbal or written informed consent obtained?

Table with columns: In ICU, In Hospital, Post Hospital, Date (dd/mm/yyyy), Consent Method: In-person, Telephone. Rows for Patient, Substitute decision maker (SDM), and Other, specify.

In New Zealand, discussion of patient wishes with family or friend documented? [ ] Yes [ ] No

Table with columns: In ICU, In Hospital, Post Hospital, Date (dd/mm/yyyy), Consent Method: In-person, Telephone. Rows for Patient, Substitute decision maker (SDM), and Other, specify.

Reason for decline, specify: [ ] Prefers PPI [ ] Prefers placebo [ ] Distressed SDM [ ] Family discord [ ] Other, specify: \_\_\_\_\_

[ ] No consent, patient lacked capacity to provide consent and no SDM available throughout hospital stay

[ ] No consent, patient deceased and was never competent to provide consent, and no SDM available throughout hospital stay

3. Consent obtained then revoked?

Table with columns: In ICU, In Hospital, Post Hospital, Date (dd/mm/yyyy). Rows for Patient, Substitute decision maker (SDM), and Other, specify.

Details (check ALL that apply):

[ ] Allow retention of data collected prior to refusal/revocation [ ] Decline retention of data collected prior to refusal/revocation
[ ] Allow data collection after refusal/revocation [ ] Decline data collection after refusal/revocation
[ ] Decline further study drug [ ] Other, specify \_\_\_\_\_

4. If no consent was obtained, has the REC/REB approved the use of this patient's data as provided?

[ ] Not applicable, consent obtained
[ ] No [ ] Yes, in original REC/REB submission -> [ ] All data collection [ ] Vital Status ONLY
[ ] Yes, by recent REC/REB correspondence -> [ ] Other, specify: \_\_\_\_\_



Form 3

|               |                      |                      |                      |                      |                      |                      |                      |                      |                      |                      |                  |                      |                      |                    |                      |                      |                      |                      |                      |                      |
|---------------|----------------------|----------------------|----------------------|----------------------|----------------------|----------------------|----------------------|----------------------|----------------------|----------------------|------------------|----------------------|----------------------|--------------------|----------------------|----------------------|----------------------|----------------------|----------------------|----------------------|
| REVISE RCT170 |                      |                      |                      |                      |                      |                      |                      |                      |                      | Plate #006           |                  |                      |                      | Visit #000         |                      |                      |                      |                      |                      |                      |
|               |                      |                      |                      |                      |                      |                      |                      |                      |                      | F L                  |                  |                      |                      | (dd/mm/yyyy)       |                      |                      |                      |                      |                      |                      |
| Patient ID    | <input type="text"/> | Patient Initials | <input type="text"/> | <input type="text"/> | Randomization Date | <input type="text"/> |
|               |                      |                      | 1                    |                      |                      |                      |                      |                      |                      |                      |                  |                      |                      |                    |                      |                      | 2                    | 0                    |                      |                      |

**RANDOMIZATION (Form 3) - CANADA**  
**FOR RESEARCH PHARMACIST**

1. Pre-Hospital H<sub>2</sub>RA or PPI receipt?  
 (including home, retirement home or nursing home)

**H<sub>2</sub>RAs:** ranitidine (Zantac),  
 cimetidine (Tagamet), famotidine (Pepcid)  
 or nizatidine (Axid)

**PPIs:** pantoprazole (Pantoloc, Tecta),  
 omeprazole (Losec), lansoprazole (Prevacid),  
 dexlansoprazole, (Dexilant), rabeprazole (Pariet)  
 or esomeprazole (Nexium)

**NO**

Patient will be in  
**Start/No Start**  
**stratum**  
 (no pre-Hospital  
 PPI or H<sub>2</sub>RA use)

**YES**

Patient will be in  
**Continue/Discontinue**  
**stratum**  
 (had pre-Hospital  
 PPI or H<sub>2</sub>RA use)

2. Date of birth:

|                      |                      |                      |                      |                      |                      |
|----------------------|----------------------|----------------------|----------------------|----------------------|----------------------|
| <input type="text"/> |
| (dd/mm/yyyy)         |                      |                      |                      |                      |                      |

**FOR RESEARCH PHARMACIST ONLY - Randomization**

via web: [www.randomize.net](http://www.randomize.net)

4. Trial assignment (please select one):

Pantoprazole

Placebo

5. Time of randomization (24 hour clock):

|                      |                      |   |                      |                      |
|----------------------|----------------------|---|----------------------|----------------------|
| <input type="text"/> | <input type="text"/> | : | <input type="text"/> | <input type="text"/> |
|----------------------|----------------------|---|----------------------|----------------------|

6. Study Pharmacist initials:

|                      |                      |
|----------------------|----------------------|
| <input type="text"/> | <input type="text"/> |
| F                    | L                    |

**Please DO NOT return to the Research Coordinator  
 or s/he will become unblinded.  
 Thanks for your help!**

29 December 2022

Form 3B

REVISE RCT170

Plate #008

Visit #000

Patient  
ID

|  |  |  |   |  |  |
|--|--|--|---|--|--|
|  |  |  | 1 |  |  |
|--|--|--|---|--|--|

Patient  
Initials

|   |   |
|---|---|
| F | L |
|   |   |

**STRATIFICATION ERROR FORM (Form 3B)**

1. Patient randomized as:

- Start/No Start stratum**, as Patient **had NO** Pre-hospital H<sub>2</sub>RA or PPI use
- Continue/Discontinue stratum**, as Patient **did have** Pre-hospital H<sub>2</sub>RA or PPI use

2. Patient should have been randomized to:

- Start/No Start stratum**, as Patient **had NO** Pre-hospital H<sub>2</sub>RA or PPI use
- Continue/Discontinue stratum**, as Patient **did have** Pre-hospital H<sub>2</sub>RA or PPI use

3. Comments:

---

---

---

---

29 December 2022





Form 6.1 of 2

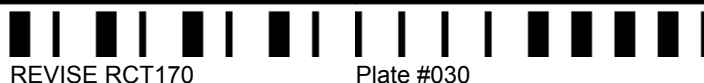

Study Day

Patient ID       Patient Initials   F L Date of Study Day        (dd/mm/yyyy)

**DAILY DATA STUDY DAYS 1-14 (Form 6.1 of 2)**

**1. Advanced life support strategies received today**

- 1. Invasive mechanical ventilation  No  Yes
- 2. Non-invasive mechanical ventilation (BiPAP):  No  Yes
- 3. Inotropes or vasopressor infusions  No  Yes  
(e.g., dopamine, norepinephrine, phenylephrine, epinephrine, milrinone, vasopressin)
- 4. Was renal replacement therapy used today?  
 No  Yes, specify: →  intermittent (IHD)  sustained low efficiency (SLED)  
 continuous (CRRT)  peritoneal

**Time Study Day 1 ONLY**

**2. Was study drug administered today?**  No  Yes

:    
(24 hr clock)

If a dose of study drug was not received today, please indicate why:

- Randomized late in the day
- Discharged from ICU or died
- Not mechanically ventilated (ICU physician discretion)
- If patient re-intubated during this ICU admission, restart REVISE study drug.
- No IV access
- Expected to die, palliative measures only
- Suspected/proven diagnosis of another exclusion criterion, specify: \_\_\_\_\_
- GI bleeding (submit **Bleed Form 9**)
- Error, missed/probably missed dose (submit **Protocol Deviation Form 12**)
- Patient declined dose
- Consent withdrawn, drug stopped (continue data collection)
- Other, specify: \_\_\_\_\_

**3. Any enteral, parenteral or oral nutrition today?**  No  Yes, specify: (check ALL that apply)

- Enteral →
- Parenteral →
- Oral

total daily ml

**4. Physiology/Laboratory results today**

hemoglobin (g/L) (lowest)     N/A      platelets (x10<sup>9</sup>/L) (lowest)     N/A

INR (highest)    N/A      PTT (s) (highest)    N/A

creatinine (umol/L) (highest)     N/A

**5. Did the patient receive packed red blood cells today?**  No  Yes →     units in total  
 ml in total

**6. Post randomization, did any of the following outcomes occur today?**

- Major gastrointestinal bleeding  No  Yes, please complete the **Bleeding Outcome Form 9**  
(Complete only one form for each discrete new major bleeding event documented)
- Clostridioides difficile* infection  No  Yes, please complete the **Clostridioides Difficile Outcome Form 10**
- Respiratory infection  No  Yes, please complete the **Respiratory Infection Outcome Form 11**  
(Complete form with new events only but not necessary on Study Day 1 for prevalent events)



Form 6.2 of 2

|                                                                                                                                                                                                                       |                                                                                                                                                          |                                                                                                                                                                                                                                                                                                                                                                                                                                         |
|-----------------------------------------------------------------------------------------------------------------------------------------------------------------------------------------------------------------------|----------------------------------------------------------------------------------------------------------------------------------------------------------|-----------------------------------------------------------------------------------------------------------------------------------------------------------------------------------------------------------------------------------------------------------------------------------------------------------------------------------------------------------------------------------------------------------------------------------------|
| REVISE RCT170                                                                                                                                                                                                         | Plate #031                                                                                                                                               | Study Day <span style="border: 1px solid black; padding: 2px 10px;">  </span>                                                                                                                                                                                                                                                                                                                                                           |
| Patient ID <span style="border: 1px solid black; padding: 2px 10px;">  </span> <span style="border: 1px solid black; padding: 2px 10px;">1</span> <span style="border: 1px solid black; padding: 2px 10px;">  </span> | Patient Initials <span style="border: 1px solid black; padding: 2px 10px;">  </span> <span style="border: 1px solid black; padding: 2px 10px;">  </span> | Date of Study Day <span style="border: 1px solid black; padding: 2px 10px;">  </span> <span style="border: 1px solid black; padding: 2px 10px;">  </span> <span style="border: 1px solid black; padding: 2px 10px;">2</span> <span style="border: 1px solid black; padding: 2px 10px;">0</span> <span style="border: 1px solid black; padding: 2px 10px;">  </span> <span style="border: 1px solid black; padding: 2px 10px;">  </span> |

### DAILY DATA STUDY DAYS 1-14 (Form 6.2 of 2)

#### 7. Did the patient receive any of the following today (post-randomization)?

1. H<sub>2</sub>RA No Yes [e.g., **cimetidine** (Tagamet, Magicul), **famotidine** (Pepcid, Ausfam, Pepzan), **ranitidine** (Zantac, Ausran, Ulcaid, Rani2, Peptisothe), **nizatidine** (Axid, Nizac, Tacidine, Tazac)]
- 
- Check if H<sub>2</sub>RA given for allowable reason (i.e., GI bleeding, patient extubated or consent withdrawn)  
(If yes and patient mechanically ventilated, submit **Protocol Deviation Form 12** for non-protocolized reason for H<sub>2</sub>RA)
2. Open label PPI No Yes [e.g., **lansoprazole** (Prevacid, lanzol relief, Zoton, Zopral), **esomeprazole** (Nexium, Nexazole, Nexole, Noxicid), **dexlansoprazole** (Dexilant), **omeprazole** (Losec, Omazol relief, Dr Reddy's Omeprazole, Midwest, Omazol IV, Acimax, Meprazole, Omepral, Ozmepr, Maxor, Pemzo, Probitor), **pantoprazole** (Pantoloc, Tecta, Panzop relief, Somac, Salpraz, Gastenz, Ozpan, Panto, Pantofast, Panthron), **rabeprazole** (Pariet, Parbezel, Parzole, Razit, Zabep)]
- 
- Check if PPI given for allowable reason (i.e., GI bleeding, patient extubated or consent withdrawn)  
(If yes and patient mechanically ventilated, submit **Protocol Deviation Form 12** for non-protocolized reason for open-label PPI)
3. Other stress ulcer prophylaxis No Yes [e.g., sulcrafate (Carafate), antacid (e.g., Maalox, Gaviscon)]
- 
4. Anticoagulant or antiplatelet agent
- |                                                                                                                                                                                                                                    | Prophylactic<br>Dose     | Intermediate<br>Dose     | Therapeutic<br>Dose      |                                                                                                             |
|------------------------------------------------------------------------------------------------------------------------------------------------------------------------------------------------------------------------------------|--------------------------|--------------------------|--------------------------|-------------------------------------------------------------------------------------------------------------|
| <input type="checkbox"/> Unfractionated heparin, specify: →                                                                                                                                                                        | <input type="checkbox"/> | <input type="checkbox"/> | <input type="checkbox"/> | <input type="checkbox"/> None                                                                               |
| <input type="checkbox"/> Low molecular weight heparin, specify: →                                                                                                                                                                  | <input type="checkbox"/> | <input type="checkbox"/> | <input type="checkbox"/> |                                                                                                             |
| <input type="checkbox"/> Warfarin (Coumadin)                                                                                                                                                                                       |                          |                          |                          | <input type="checkbox"/> Non-steroid anti-inflammatory drug (NSAID)                                         |
| <input type="checkbox"/> Aspirin (ASA), specify: <input type="checkbox"/> ≤ 325mg daily <input type="checkbox"/> > 325mg daily                                                                                                     |                          |                          |                          | <input type="checkbox"/> New oral anticoagulants (NOAC) (e.g., Rivaroxiban, Apixaban, Dabigatran, Edoxaban) |
| <input type="checkbox"/> Clopidogrel (Plavix)                                                                                                                                                                                      |                          |                          |                          |                                                                                                             |
| <input type="checkbox"/> Others [e.g., Dipyridamole (Persantine), Ticlopidine (Ticlid), Tirofiban (Aggrastat), Eptifatide (Integrilin), Direct thrombin inhibitors (Bivalirudin), Prasugrel, Ticagrelor, Cangrelor] specify: _____ |                          |                          |                          |                                                                                                             |
5. Oral or IV corticosteroids (e.g., prednisone, hydrocortisone, solumedrol, dexamethasone) No Yes, specify: IV Oral
- 
6. Probiotics No Yes
- If open-label probiotics, specify: \_\_\_\_\_

#### 8. Was there an adverse event today believed by either the ICU physician or Site Investigator to be directly related to enrolment in the study?

- If yes, please notify the REVISE Methods Center **within 24 hours** of becoming aware of the Adverse Event. An **Adverse Event Directly Related to the Study Form 17** is required and please ask the ICU physician to sign it and send to the REVISE Methods Center
- No Yes

#### 9. Was today the last day of study daily data collection?

- No
- Yes, patient died, was discharged to the ward, or drug stopped at 90 days (submit **Final Status Form 14**)
- Yes, consent withdrawn for further data collection (submit a **Final Status Form 14**)

29 December 2022











|                                                                                                                                                                                                        |                                                                                 |            |                                                                          |
|--------------------------------------------------------------------------------------------------------------------------------------------------------------------------------------------------------|---------------------------------------------------------------------------------|------------|--------------------------------------------------------------------------|
|                                                                                                                                                                                                        |                                                                                 |            | Study Day <span style="border: 1px solid black; padding: 2px;">  </span> |
|                                                                                                                                                                                                        | REVISE RCT170                                                                   | Plate #050 | F L                                                                      |
| Patient ID <span style="border: 1px solid black; padding: 2px;">  </span> <span style="border: 1px solid black; padding: 2px;">1</span> <span style="border: 1px solid black; padding: 2px;">  </span> | Patient Initials <span style="border: 1px solid black; padding: 2px;">  </span> |            | <b>RESPIRATORY INFECTION<br/>OUTCOME (Form 11)</b>                       |

  

|                                                                                                                                                                                                                                                                                                                                                                                                                                                      |                                                                                                                                                                                                                                                                                                                                                                                                                                                                                                                                                                                                                                                                                                                                                                                               |                                                                                                                                                                                                                                                                                                                                                                                                             |                                                                                                                                                                                                               |
|------------------------------------------------------------------------------------------------------------------------------------------------------------------------------------------------------------------------------------------------------------------------------------------------------------------------------------------------------------------------------------------------------------------------------------------------------|-----------------------------------------------------------------------------------------------------------------------------------------------------------------------------------------------------------------------------------------------------------------------------------------------------------------------------------------------------------------------------------------------------------------------------------------------------------------------------------------------------------------------------------------------------------------------------------------------------------------------------------------------------------------------------------------------------------------------------------------------------------------------------------------------|-------------------------------------------------------------------------------------------------------------------------------------------------------------------------------------------------------------------------------------------------------------------------------------------------------------------------------------------------------------------------------------------------------------|---------------------------------------------------------------------------------------------------------------------------------------------------------------------------------------------------------------|
| <b>2 Days Prior to Respiratory Infection:</b><br>(~ 24-48 hour period Pre-Resp Infection day reported) <span style="border: 1px solid black; padding: 2px;">  </span> <span style="border: 1px solid black; padding: 2px;">  </span> <span style="border: 1px solid black; padding: 2px;">20</span> <span style="border: 1px solid black; padding: 2px;">  </span><br><input type="checkbox"/> N/A, data unavailable pt not in hospital (dd/mm/yyyy) |                                                                                                                                                                                                                                                                                                                                                                                                                                                                                                                                                                                                                                                                                                                                                                                               |                                                                                                                                                                                                                                                                                                                                                                                                             | New, progressive or persistent CXR infiltrate? (Check ALL that apply)                                                                                                                                         |
| Highest temp °C <span style="border: 1px solid black; padding: 2px;">  </span> <span style="border: 1px solid black; padding: 2px;">  </span> <span style="border: 1px solid black; padding: 2px;">.</span> <span style="border: 1px solid black; padding: 2px;">  </span> <input type="checkbox"/> N/A<br><input type="checkbox"/> PO <input type="checkbox"/> Ax or Tymp <input type="checkbox"/> Core/Rectal                                      | Highest WBC count (10 <sup>9</sup> /L) <span style="border: 1px solid black; padding: 2px;">  </span> <span style="border: 1px solid black; padding: 2px;">  </span> <span style="border: 1px solid black; padding: 2px;">  </span> <span style="border: 1px solid black; padding: 2px;">.</span> <span style="border: 1px solid black; padding: 2px;">  </span> <input type="checkbox"/> N/A<br>Lowest WBC count (10 <sup>9</sup> /L) <span style="border: 1px solid black; padding: 2px;">  </span> <span style="border: 1px solid black; padding: 2px;">  </span> <span style="border: 1px solid black; padding: 2px;">  </span> <span style="border: 1px solid black; padding: 2px;">.</span> <span style="border: 1px solid black; padding: 2px;">  </span> <input type="checkbox"/> N/A | Lowest PaO <sub>2</sub> /FIO <sub>2</sub> <span style="border: 1px solid black; padding: 2px;">  </span> <span style="border: 1px solid black; padding: 2px;">  </span> <span style="border: 1px solid black; padding: 2px;">  </span> <input type="checkbox"/> N/A<br>Tracheal secretions:<br><input type="checkbox"/> None/minimal<br><input type="checkbox"/> Moderate<br><input type="checkbox"/> Large | <input type="checkbox"/> None or no CXR<br><input type="checkbox"/> Patchy/diffuse<br><input type="checkbox"/> Lobar/bilobar<br><input type="checkbox"/> Consolidation<br><input type="checkbox"/> Cavitation |
| Lowest temp °C <span style="border: 1px solid black; padding: 2px;">  </span> <span style="border: 1px solid black; padding: 2px;">  </span> <span style="border: 1px solid black; padding: 2px;">.</span> <span style="border: 1px solid black; padding: 2px;">  </span> <input type="checkbox"/> N/A<br><input type="checkbox"/> PO <input type="checkbox"/> Ax or Tymp <input type="checkbox"/> Core/Rectal                                       | Bands present? <input type="checkbox"/> No <input type="checkbox"/> Yes<br>ARDS present? <input type="checkbox"/> No <input type="checkbox"/> Yes                                                                                                                                                                                                                                                                                                                                                                                                                                                                                                                                                                                                                                             | Purulent or mucopurulent?<br><input type="checkbox"/> No <input type="checkbox"/> Yes                                                                                                                                                                                                                                                                                                                       | Potential Pathogen cultured? <input type="checkbox"/> No <input type="checkbox"/> Yes<br>Nasopharyngeal swab (NPS) positive? <input type="checkbox"/> No <input type="checkbox"/> Yes                         |

  

|                                                                                                                                                                                                                                                                                                                                                                                                                                                  |                                                                                                                                                                                                                                                                                                                                                                                                                                                                                                                                                                                                                                                                                                                                                                                               |                                                                                                                                                                                                                                                                                                                                                                                                             |                                                                                                                                                                                                               |
|--------------------------------------------------------------------------------------------------------------------------------------------------------------------------------------------------------------------------------------------------------------------------------------------------------------------------------------------------------------------------------------------------------------------------------------------------|-----------------------------------------------------------------------------------------------------------------------------------------------------------------------------------------------------------------------------------------------------------------------------------------------------------------------------------------------------------------------------------------------------------------------------------------------------------------------------------------------------------------------------------------------------------------------------------------------------------------------------------------------------------------------------------------------------------------------------------------------------------------------------------------------|-------------------------------------------------------------------------------------------------------------------------------------------------------------------------------------------------------------------------------------------------------------------------------------------------------------------------------------------------------------------------------------------------------------|---------------------------------------------------------------------------------------------------------------------------------------------------------------------------------------------------------------|
| <b>1 Day Prior to Respiratory Infection:</b><br>(~ 24 hour period Pre-Resp Infection day reported) <span style="border: 1px solid black; padding: 2px;">  </span> <span style="border: 1px solid black; padding: 2px;">  </span> <span style="border: 1px solid black; padding: 2px;">20</span> <span style="border: 1px solid black; padding: 2px;">  </span><br><input type="checkbox"/> N/A, data unavailable pt not in hospital (dd/mm/yyyy) |                                                                                                                                                                                                                                                                                                                                                                                                                                                                                                                                                                                                                                                                                                                                                                                               |                                                                                                                                                                                                                                                                                                                                                                                                             | New, progressive or persistent CXR infiltrate? (Check ALL that apply)                                                                                                                                         |
| Highest temp °C <span style="border: 1px solid black; padding: 2px;">  </span> <span style="border: 1px solid black; padding: 2px;">  </span> <span style="border: 1px solid black; padding: 2px;">.</span> <span style="border: 1px solid black; padding: 2px;">  </span> <input type="checkbox"/> N/A<br><input type="checkbox"/> PO <input type="checkbox"/> Ax or Tymp <input type="checkbox"/> Core/Rectal                                  | Highest WBC count (10 <sup>9</sup> /L) <span style="border: 1px solid black; padding: 2px;">  </span> <span style="border: 1px solid black; padding: 2px;">  </span> <span style="border: 1px solid black; padding: 2px;">  </span> <span style="border: 1px solid black; padding: 2px;">.</span> <span style="border: 1px solid black; padding: 2px;">  </span> <input type="checkbox"/> N/A<br>Lowest WBC count (10 <sup>9</sup> /L) <span style="border: 1px solid black; padding: 2px;">  </span> <span style="border: 1px solid black; padding: 2px;">  </span> <span style="border: 1px solid black; padding: 2px;">  </span> <span style="border: 1px solid black; padding: 2px;">.</span> <span style="border: 1px solid black; padding: 2px;">  </span> <input type="checkbox"/> N/A | Lowest PaO <sub>2</sub> /FIO <sub>2</sub> <span style="border: 1px solid black; padding: 2px;">  </span> <span style="border: 1px solid black; padding: 2px;">  </span> <span style="border: 1px solid black; padding: 2px;">  </span> <input type="checkbox"/> N/A<br>Tracheal secretions:<br><input type="checkbox"/> None/minimal<br><input type="checkbox"/> Moderate<br><input type="checkbox"/> Large | <input type="checkbox"/> None or no CXR<br><input type="checkbox"/> Patchy/diffuse<br><input type="checkbox"/> Lobar/bilobar<br><input type="checkbox"/> Consolidation<br><input type="checkbox"/> Cavitation |
| Lowest temp °C <span style="border: 1px solid black; padding: 2px;">  </span> <span style="border: 1px solid black; padding: 2px;">  </span> <span style="border: 1px solid black; padding: 2px;">.</span> <span style="border: 1px solid black; padding: 2px;">  </span> <input type="checkbox"/> N/A<br><input type="checkbox"/> PO <input type="checkbox"/> Ax or Tymp <input type="checkbox"/> Core/Rectal                                   | Bands present? <input type="checkbox"/> No <input type="checkbox"/> Yes<br>ARDS present? <input type="checkbox"/> No <input type="checkbox"/> Yes                                                                                                                                                                                                                                                                                                                                                                                                                                                                                                                                                                                                                                             | Purulent or mucopurulent?<br><input type="checkbox"/> No <input type="checkbox"/> Yes                                                                                                                                                                                                                                                                                                                       | Potential Pathogen cultured? <input type="checkbox"/> No <input type="checkbox"/> Yes<br>Nasopharyngeal swab (NPS) positive? <input type="checkbox"/> No <input type="checkbox"/> Yes                         |

  

|                                                                                                                                                                                                                                                                                                                                                                                                                 |                                                                                                                                                                                                                                                                                                                                                                                                                                                                                                                                                                                                                                                                                                                                                                                               |                                                                                                                                                                                                                                                                                                                                                                                                             |                                                                                                                                                                                                               |
|-----------------------------------------------------------------------------------------------------------------------------------------------------------------------------------------------------------------------------------------------------------------------------------------------------------------------------------------------------------------------------------------------------------------|-----------------------------------------------------------------------------------------------------------------------------------------------------------------------------------------------------------------------------------------------------------------------------------------------------------------------------------------------------------------------------------------------------------------------------------------------------------------------------------------------------------------------------------------------------------------------------------------------------------------------------------------------------------------------------------------------------------------------------------------------------------------------------------------------|-------------------------------------------------------------------------------------------------------------------------------------------------------------------------------------------------------------------------------------------------------------------------------------------------------------------------------------------------------------------------------------------------------------|---------------------------------------------------------------------------------------------------------------------------------------------------------------------------------------------------------------|
| <b>DAY OF RESPIRATORY INFECTION:</b> <span style="border: 1px solid black; padding: 2px;">  </span> <span style="border: 1px solid black; padding: 2px;">  </span> <span style="border: 1px solid black; padding: 2px;">20</span> <span style="border: 1px solid black; padding: 2px;">  </span><br>(dd/mm/yyyy)                                                                                                |                                                                                                                                                                                                                                                                                                                                                                                                                                                                                                                                                                                                                                                                                                                                                                                               |                                                                                                                                                                                                                                                                                                                                                                                                             | New, progressive or persistent CXR infiltrate? (Check ALL that apply)                                                                                                                                         |
| Highest temp °C <span style="border: 1px solid black; padding: 2px;">  </span> <span style="border: 1px solid black; padding: 2px;">  </span> <span style="border: 1px solid black; padding: 2px;">.</span> <span style="border: 1px solid black; padding: 2px;">  </span> <input type="checkbox"/> N/A<br><input type="checkbox"/> PO <input type="checkbox"/> Ax or Tymp <input type="checkbox"/> Core/Rectal | Highest WBC count (10 <sup>9</sup> /L) <span style="border: 1px solid black; padding: 2px;">  </span> <span style="border: 1px solid black; padding: 2px;">  </span> <span style="border: 1px solid black; padding: 2px;">  </span> <span style="border: 1px solid black; padding: 2px;">.</span> <span style="border: 1px solid black; padding: 2px;">  </span> <input type="checkbox"/> N/A<br>Lowest WBC count (10 <sup>9</sup> /L) <span style="border: 1px solid black; padding: 2px;">  </span> <span style="border: 1px solid black; padding: 2px;">  </span> <span style="border: 1px solid black; padding: 2px;">  </span> <span style="border: 1px solid black; padding: 2px;">.</span> <span style="border: 1px solid black; padding: 2px;">  </span> <input type="checkbox"/> N/A | Lowest PaO <sub>2</sub> /FIO <sub>2</sub> <span style="border: 1px solid black; padding: 2px;">  </span> <span style="border: 1px solid black; padding: 2px;">  </span> <span style="border: 1px solid black; padding: 2px;">  </span> <input type="checkbox"/> N/A<br>Tracheal secretions:<br><input type="checkbox"/> None/minimal<br><input type="checkbox"/> Moderate<br><input type="checkbox"/> Large | <input type="checkbox"/> None or no CXR<br><input type="checkbox"/> Patchy/diffuse<br><input type="checkbox"/> Lobar/bilobar<br><input type="checkbox"/> Consolidation<br><input type="checkbox"/> Cavitation |
| Lowest temp °C <span style="border: 1px solid black; padding: 2px;">  </span> <span style="border: 1px solid black; padding: 2px;">  </span> <span style="border: 1px solid black; padding: 2px;">.</span> <span style="border: 1px solid black; padding: 2px;">  </span> <input type="checkbox"/> N/A<br><input type="checkbox"/> PO <input type="checkbox"/> Ax or Tymp <input type="checkbox"/> Core/Rectal  | Bands present? <input type="checkbox"/> No <input type="checkbox"/> Yes<br>ARDS present? <input type="checkbox"/> No <input type="checkbox"/> Yes                                                                                                                                                                                                                                                                                                                                                                                                                                                                                                                                                                                                                                             | Purulent or mucopurulent?<br><input type="checkbox"/> No <input type="checkbox"/> Yes                                                                                                                                                                                                                                                                                                                       | Potential Pathogen cultured? <input type="checkbox"/> No <input type="checkbox"/> Yes<br>Nasopharyngeal swab (NPS) positive? <input type="checkbox"/> No <input type="checkbox"/> Yes                         |

  

|                                                                                                                                                                                                                                                                                                                                                                                                                 |                                                                                                                                                                                                                                                                                                                                                                                                                                                                                                                                                                                                                                                                                                                                                                                               |                                                                                                                                      |                                                                                                                                                                                                                                                                     |                                                                       |
|-----------------------------------------------------------------------------------------------------------------------------------------------------------------------------------------------------------------------------------------------------------------------------------------------------------------------------------------------------------------------------------------------------------------|-----------------------------------------------------------------------------------------------------------------------------------------------------------------------------------------------------------------------------------------------------------------------------------------------------------------------------------------------------------------------------------------------------------------------------------------------------------------------------------------------------------------------------------------------------------------------------------------------------------------------------------------------------------------------------------------------------------------------------------------------------------------------------------------------|--------------------------------------------------------------------------------------------------------------------------------------|---------------------------------------------------------------------------------------------------------------------------------------------------------------------------------------------------------------------------------------------------------------------|-----------------------------------------------------------------------|
| <b>24 hours POST Respiratory Infection:</b> <span style="border: 1px solid black; padding: 2px;">  </span> <span style="border: 1px solid black; padding: 2px;">  </span> <span style="border: 1px solid black; padding: 2px;">20</span> <span style="border: 1px solid black; padding: 2px;">  </span><br>(dd/mm/yyyy)                                                                                         |                                                                                                                                                                                                                                                                                                                                                                                                                                                                                                                                                                                                                                                                                                                                                                                               |                                                                                                                                      | Lowest PaO <sub>2</sub> /FIO <sub>2</sub> <span style="border: 1px solid black; padding: 2px;">  </span> <span style="border: 1px solid black; padding: 2px;">  </span> <span style="border: 1px solid black; padding: 2px;">  </span> <input type="checkbox"/> N/A | New, progressive or persistent CXR infiltrate? (Check ALL that apply) |
| Highest temp °C <span style="border: 1px solid black; padding: 2px;">  </span> <span style="border: 1px solid black; padding: 2px;">  </span> <span style="border: 1px solid black; padding: 2px;">.</span> <span style="border: 1px solid black; padding: 2px;">  </span> <input type="checkbox"/> N/A<br><input type="checkbox"/> PO <input type="checkbox"/> Ax or Tymp <input type="checkbox"/> Core/Rectal | Highest WBC count (10 <sup>9</sup> /L) <span style="border: 1px solid black; padding: 2px;">  </span> <span style="border: 1px solid black; padding: 2px;">  </span> <span style="border: 1px solid black; padding: 2px;">  </span> <span style="border: 1px solid black; padding: 2px;">.</span> <span style="border: 1px solid black; padding: 2px;">  </span> <input type="checkbox"/> N/A<br>Lowest WBC count (10 <sup>9</sup> /L) <span style="border: 1px solid black; padding: 2px;">  </span> <span style="border: 1px solid black; padding: 2px;">  </span> <span style="border: 1px solid black; padding: 2px;">  </span> <span style="border: 1px solid black; padding: 2px;">.</span> <span style="border: 1px solid black; padding: 2px;">  </span> <input type="checkbox"/> N/A | Tracheal secretions:<br><input type="checkbox"/> None/minimal<br><input type="checkbox"/> Moderate<br><input type="checkbox"/> Large | <input type="checkbox"/> None or no CXR<br><input type="checkbox"/> Patchy/diffuse<br><input type="checkbox"/> Lobar/bilobar<br><input type="checkbox"/> Consolidation<br><input type="checkbox"/> Cavitation                                                       |                                                                       |
| Lowest temp °C <span style="border: 1px solid black; padding: 2px;">  </span> <span style="border: 1px solid black; padding: 2px;">  </span> <span style="border: 1px solid black; padding: 2px;">.</span> <span style="border: 1px solid black; padding: 2px;">  </span> <input type="checkbox"/> N/A<br><input type="checkbox"/> PO <input type="checkbox"/> Ax or Tymp <input type="checkbox"/> Core/Rectal  | Bands present? <input type="checkbox"/> No <input type="checkbox"/> Yes<br>ARDS present? <input type="checkbox"/> No <input type="checkbox"/> Yes                                                                                                                                                                                                                                                                                                                                                                                                                                                                                                                                                                                                                                             | Purulent or mucopurulent?<br><input type="checkbox"/> No <input type="checkbox"/> Yes                                                | Potential Pathogen cultured? <input type="checkbox"/> No <input type="checkbox"/> Yes<br>Nasopharyngeal swab (NPS) positive? <input type="checkbox"/> No <input type="checkbox"/> Yes                                                                               |                                                                       |
|                                                                                                                                                                                                                                                                                                                                                                                                                 |                                                                                                                                                                                                                                                                                                                                                                                                                                                                                                                                                                                                                                                                                                                                                                                               |                                                                                                                                      | Calculated REVISE Methods Center CPIS Score: <span style="border: 1px solid black; padding: 2px;">  </span> <span style="border: 1px solid black; padding: 2px;">  </span>                                                                                          |                                                                       |

Form 5.1

REVISE RCT170

Plate #015

Visit #000

Patient ID     1

Patient Initials

No cultures performed

**CULTURE REPORT (Form 5.1)**

Please list all gram stains and cultures performed in the ICU related to Pulmonary Infections (including from sputum, endotracheal aspirate, bronchoscopy, pleural fluid, nasopharyngeal swab for virus, urine Legionella) and blood culture considered to be related to the pneumonia (i.e., Same organism identified in blood and respiratory specimen).

|    | Date of Specimen (dd/mm/yyyy)                                                                                                     | Result                                                              | Organism Code(s) (Please list all today)<br>If more than 3 organisms to report, use additional line.                          |
|----|-----------------------------------------------------------------------------------------------------------------------------------|---------------------------------------------------------------------|-------------------------------------------------------------------------------------------------------------------------------|
| 1. | <input type="text"/> <input type="text"/> <input type="text"/> 2 <input type="text"/> 0 <input type="text"/> <input type="text"/> | <input type="checkbox"/> positive <input type="checkbox"/> negative | <input type="text"/> <input type="text"/> <input type="text"/> <input type="text"/> <input type="text"/> <input type="text"/> |
|    | Specify Location <input type="text"/> <input type="text"/>                                                                        |                                                                     |                                                                                                                               |
| 2. | <input type="text"/> <input type="text"/> <input type="text"/> 2 <input type="text"/> 0 <input type="text"/> <input type="text"/> | <input type="checkbox"/> positive <input type="checkbox"/> negative | <input type="text"/> <input type="text"/> <input type="text"/> <input type="text"/> <input type="text"/> <input type="text"/> |
|    | Specify Location <input type="text"/> <input type="text"/>                                                                        |                                                                     |                                                                                                                               |
| 3. | <input type="text"/> <input type="text"/> <input type="text"/> 2 <input type="text"/> 0 <input type="text"/> <input type="text"/> | <input type="checkbox"/> positive <input type="checkbox"/> negative | <input type="text"/> <input type="text"/> <input type="text"/> <input type="text"/> <input type="text"/> <input type="text"/> |
|    | Specify Location <input type="text"/> <input type="text"/>                                                                        |                                                                     |                                                                                                                               |
| 4. | <input type="text"/> <input type="text"/> <input type="text"/> 2 <input type="text"/> 0 <input type="text"/> <input type="text"/> | <input type="checkbox"/> positive <input type="checkbox"/> negative | <input type="text"/> <input type="text"/> <input type="text"/> <input type="text"/> <input type="text"/> <input type="text"/> |
|    | Specify Location <input type="text"/> <input type="text"/>                                                                        |                                                                     |                                                                                                                               |
| 5. | <input type="text"/> <input type="text"/> <input type="text"/> 2 <input type="text"/> 0 <input type="text"/> <input type="text"/> | <input type="checkbox"/> positive <input type="checkbox"/> negative | <input type="text"/> <input type="text"/> <input type="text"/> <input type="text"/> <input type="text"/> <input type="text"/> |
|    | Specify Location <input type="text"/> <input type="text"/>                                                                        |                                                                     |                                                                                                                               |
| 6. | <input type="text"/> <input type="text"/> <input type="text"/> 2 <input type="text"/> 0 <input type="text"/> <input type="text"/> | <input type="checkbox"/> positive <input type="checkbox"/> negative | <input type="text"/> <input type="text"/> <input type="text"/> <input type="text"/> <input type="text"/> <input type="text"/> |
|    | Specify Location <input type="text"/> <input type="text"/>                                                                        |                                                                     |                                                                                                                               |
| 7. | <input type="text"/> <input type="text"/> <input type="text"/> 2 <input type="text"/> 0 <input type="text"/> <input type="text"/> | <input type="checkbox"/> positive <input type="checkbox"/> negative | <input type="text"/> <input type="text"/> <input type="text"/> <input type="text"/> <input type="text"/> <input type="text"/> |
|    | Specify Location <input type="text"/> <input type="text"/>                                                                        |                                                                     |                                                                                                                               |

Please check if additional forms are required for reporting positive cultures

29 December 2022



Form 12

REVISION RCT170 Plate #070

Study Day

Patient ID 1 Patient Initials FL Date of Study Day 20

PROTOCOL DEVIATION - RESEARCH COORDINATOR REPORT (Form 12)

1. Protocol deviation (check ALL that apply)

- 1. Randomization of ineligible patient (only submit to local REB upon review with Methods Center and as per local guidelines)
2. Missed dose of study drug
3. Received wrong study drug
4. Open label PPI administered (e.g., not study drug)
5. H2RA administered
6. Other (specify):

2. Explanation:

3. Were there any consequences to the patient? No Yes, specify:

4. Actions taken, specify:



Form 14

REVISION RCT170 Plate #080

Study Day

Patient ID 1 Patient Initials F L

FINAL STATUS (Form 14)

1. Patient discharged from ICU?

Form for patient discharge from ICU with checkboxes for survival, death, or unknown status, and date fields for ICU discharge and death.

Proximate cause of death in ICU (select one option)

Other, specify: \_\_\_\_\_

Underlying cause of death in ICU (select up to 3 options)

Other, specify: \_\_\_\_\_
Other, specify: \_\_\_\_\_
Other, specify: \_\_\_\_\_

2. Patient READMITTED to ICU during this index hospital admission?

(NOTE: No need to restart study drug with patient ICU readmission)

If yes, was readmission for Upper GI bleeding?

Form for ICU readmission with checkboxes for Yes/No and date fields for readmission and discharge.

If Yes, patient readmitted to ICU for upper GI bleeding, please complete Gastrointestinal Bleeding Outcome Form 9)

3. Patient discharged from Hospital?

Form for hospital discharge with checkboxes for survival or death, and date fields for hospital discharge and death.

- Yes, home
Yes, acute care facility (non-REVISE site)
Yes, long term care facility
Yes, rehabilitation center
Other, specify: \_\_\_\_\_

Underlying cause of death in hospital (select up to 3 options)

Proximate cause of death in hospital (select one option)

Other, specify: \_\_\_\_\_
Unknown (e.g., consent revoked), specify: \_\_\_\_\_

Other, specify: \_\_\_\_\_
Other, specify: \_\_\_\_\_
Other, specify: \_\_\_\_\_

4. Was this patient confirmed COVID positive anytime from hospital admission up to hospital discharge?

Yes/No checkboxes and date field for confirmed positive status.

5. Vital status at 90 days following randomization?

How was the 90 day vital status obtained?

- Medical record
Phone call to other hospital, care facility or family MD
Phone call to patient, SDM or family member
Other, specify: \_\_\_\_\_
Not obtained, explain: \_\_\_\_\_

Alive/Deceased checkboxes

- Home
Study hospital
Chronic care, long term care facility
Other acute care facility (non-REVISE site)
Palliative care hospital or facility
Inpatient rehabilitation center
Other, specify: \_\_\_\_\_

Date of contact (dd/mm/yyyy)

Date of Death, if applicable (dd/mm/yyyy)









Form 17.3 of 3

REVISION RCT170 Plate #086

Study Day

Patient ID 1 Patient Initials F L

ADVERSE EVENT - DIRECTLY RELATED TO THE STUDY (Form 17.3 of 3)

10. Potential confounding factors/relevant medical history:

11. Was the study treatment unblinded? No Yes, please complete the Code Break Form 18

12. Does the Investigator or Site Investigator believe that this event is directly related to the REVISE study drug? No Yes, specify reason:

13. Reporter Name: Reporter Signature:

Reporter Designation: Reporter Telephone:

Date of Report: Date (dd/mm/yyyy) 20 Methods Center Contacted? No Yes

14. I have reviewed this report and agree with its contents

ICU Physician name ICU Physician signature Date (dd/mm/yyyy) 20
Site Investigator name Site Investigator signature Date (dd/mm/yyyy) 20

Please fax (+1-905-308-7223) or scan this form immediately to the REVISE Methods Center at REVISE@stjosham.on.ca and call the REVISE Methods Center (+1-905-512-5935)
